# Supplementary material for: Pt/IrOx enables selective electrochemical C-H chlorination at high current
Source: PubMed Central journal article supplement — Nat Commun. 2025 Jan 2;16:166. doi: 10.1038/s41467-024-55283-x (PMC11696171; doi:10.1038/s41467-024-55283-x), 2025-01-02
Supplement: 41467_2024_55283_MOESM2_ESM.pdf [file 41467_2024_55283_MOESM2_ESM.pdf]

### **Description of Additional Supplementary Files**

Supplementary Movie 1 describes the formation of the emulsion with different stirring speeds.

Supplementary Data 1 shows the atomic coordinates of the optimized models.
